# Supplementary material for: Temporal dependence of shifts in mu opioid receptor mobility at the cell surface after agonist binding observed by single-particle tracking
Source: PubMed Central journal article supplement (PMC6514008; doi:10.1038/s41598-019-43657-x), 2019-05-13
Supplement: 41598_2019_43657_MOESM1_ESM.pdf [file 41598_2019_43657_MOESM1_ESM.pdf]

## **Supplemental Figures**

### **Temporal dependence of shifts in mu opioid receptor mobility at the cell surface after agonist binding observed by single-particle tracking**

Marissa J. Metz<sup>1,#</sup>, Reagan L. Pennock<sup>1,+,#</sup>, Diego Krapf<sup>2,3,\*</sup>, Shane T. Hentges<sup>1,\*</sup>

<sup>1</sup>Department of Biomedical Sciences, Colorado State University, Fort Collins, CO, USA.

<sup>2</sup>Department of Electrical and Computer Engineering, Colorado State University, Fort Collins, CO, USA.

<sup>3</sup>School of Biomedical Engineering, Colorado State University, Fort Collins, CO, USA.

<sup>†</sup>Current address: Department of Neurobiology, University of Alabama at Birmingham, Birmingham, AL, USA.

\*Corresponding authors: S.T.H., Colorado State University, 1617 Campus Delivery, Fort Collins, CO 80521, USA. [hentgess@colostate.edu](mailto:hentgess@colostate.edu) D.K., Colorado State University, 1301 Campus Delivery, Fort Collins, CO 80523, USA. [diego.krapf@colostate.edu](mailto:diego.krapf@colostate.edu)

<sup>#,\*</sup>These authors contributed equally to the work

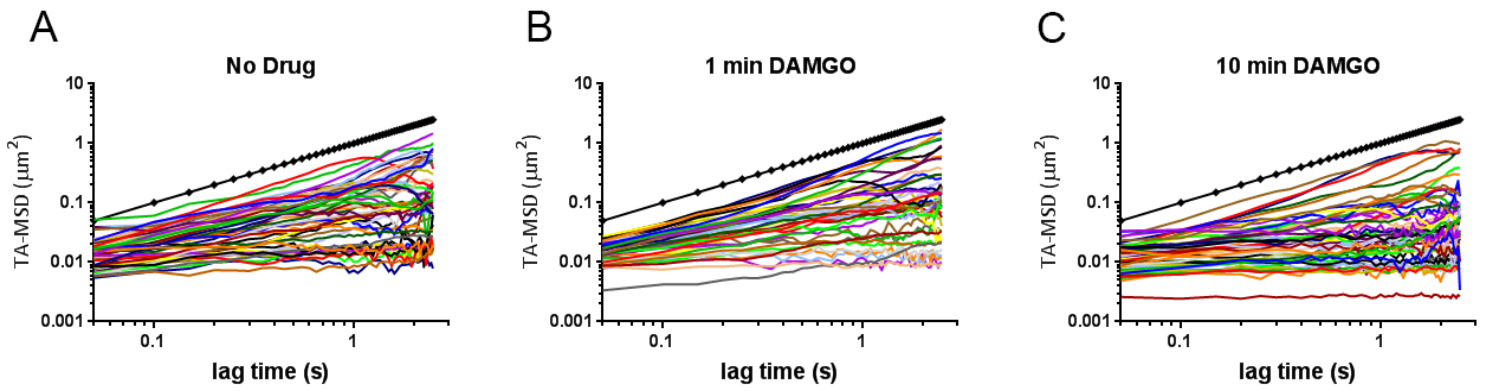

**Figure S1. Individual MSDs of randomly chosen trajectories.** Log-log plots of time averaged MSDs from individual tracks in the **A)** no drug, **B)** 1 min DAMGO, and **C)** 10 min DAMGO experimental conditions. Most trajectories are subdiffusive, as they lie below the slope of a simulated track of  $\alpha = 1$  (black dotted line).

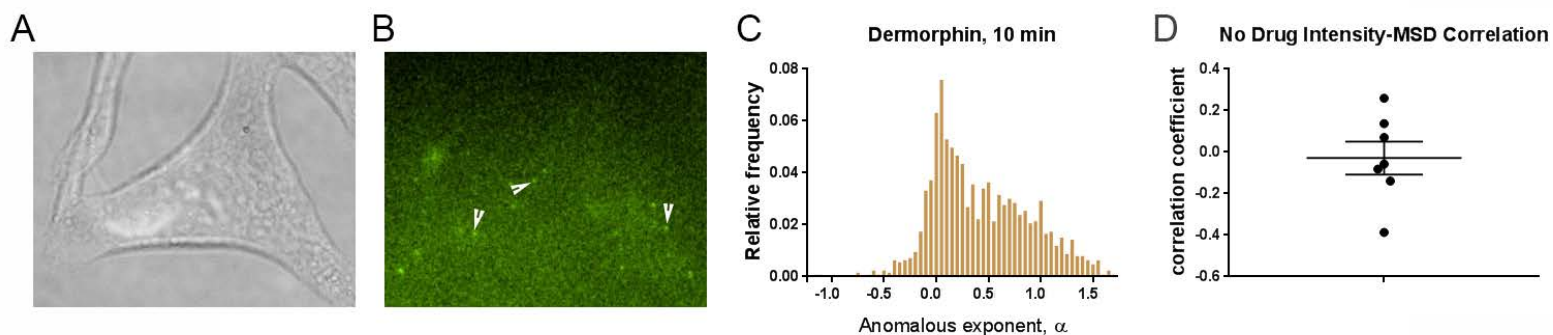

**Figure S2. Single particle tracking after 10 min of Dermorphin-488 (60 pM) application reveals that the immobile population of MORs is not due to antibody-mediated crosslinking or Qdot hindering of mobility. A.)** DIC image of an AtT20 cell labeled with Dermorphin-488. **B.)** The same cell is shown under fluorescence, and arrows indicate MORs labeled with a single Dermorphin-488 conjugate. **C.)** Distribution of  $\alpha$  values after tracking of MOR-Dermorphin-488 conjugates ( $n = 5$  cells, 1266 tracks) incubated for 10 min in the presence of 60 pM Dermorphin-488. The distribution of  $\alpha$  values is similar to those observed with Qdot tracking, and the fraction of  $\alpha < 0.27$  is  $0.44 \pm 0.08$ , similar to MOR-Qdots in the 10 min DAMGO condition ( $0.45 \pm 0.12$ ). Values below 0 are likely due to errors made during tracking caused by the low signal to noise ratio with this labeling approach. **D.)** Distribution of MSD vs. fluorescence intensity correlation coefficients for individual cells in the no drug condition, with a mean correlation coefficient of  $-0.03 \pm 0.08$ .

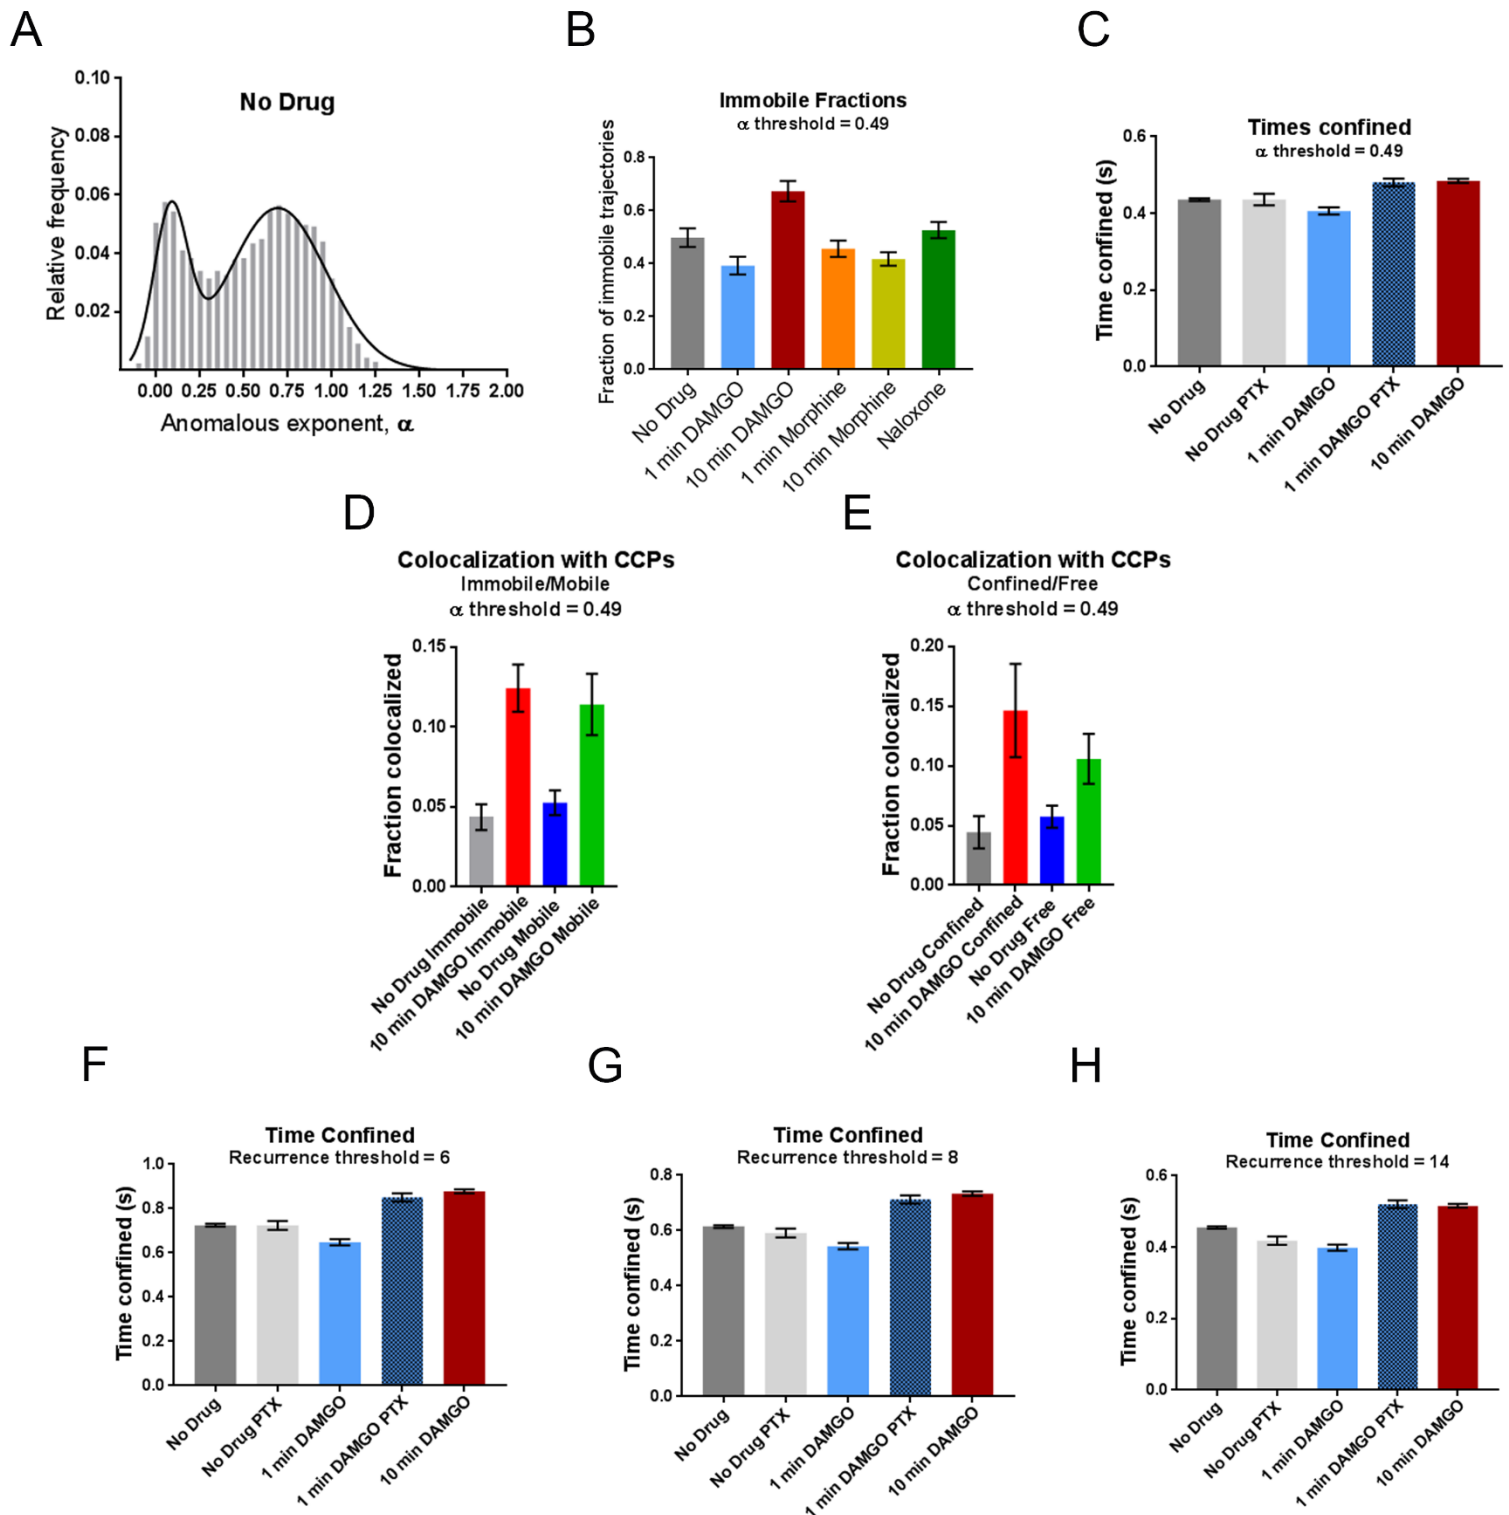

**Figure S3. Reported results are robust to changes in mobile/immobile and confined/free thresholds.**

**A)** Two Gaussian fitting results in a threshold near our chosen threshold of  $\alpha = 0.27$ . **B)** The pattern for fraction of immobile trajectories does not change when using the threshold of  $\alpha = 0.49$  determined

using k-means for most experimental conditions, with the exception of 10 min Morphine. **C)** The pattern of confined times does not change at an  $\alpha = 0.49$  threshold. **D)** The pattern of colocalization with CCPs does not change when comparing immobile and mobile trajectories or **E)** confined and free trajectories. **F)** Changing the recurrence threshold during recurrence analysis does not change the time confined when the recurrence threshold is 6, **G)** 8, **H)** or 14.

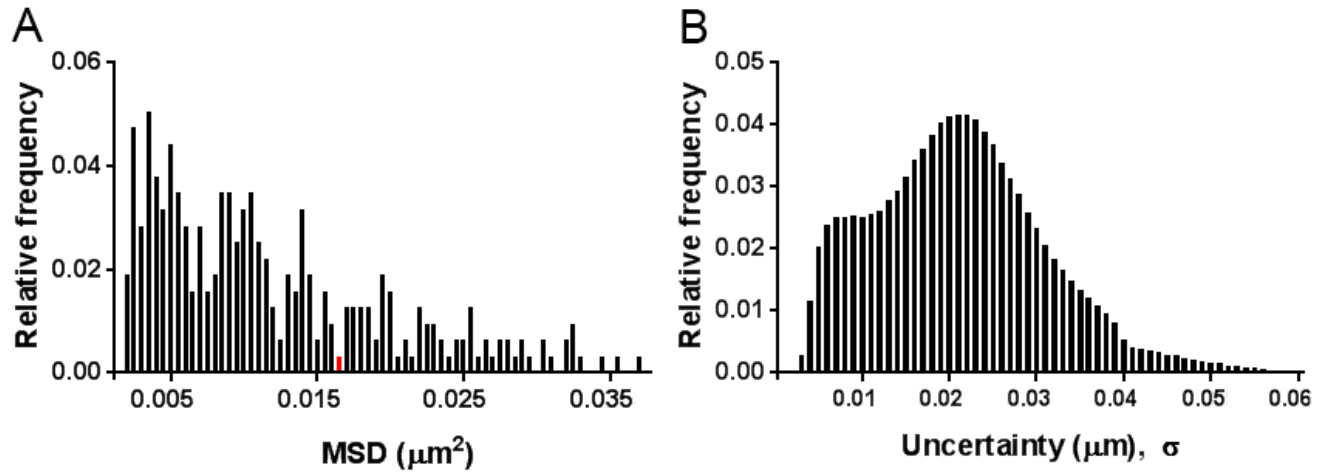

**Figure S4. Data for trajectory corrections. A)** Frequency histogram of MSD for glass-stuck Qdot-655 tracked without cells on the coverslip. The cutoff of  $0.0165 \mu\text{m}^2$  is highlighted in red. Most MSDs are less than this cutoff. **B)** Histogram of localization uncertainties,  $\sigma$ , for each detected particle of a representative subset in the no drug condition. An average  $\sigma$  of  $0.02 \mu\text{m}$  was used for uncertainty correction of tracks.
